# Supplementary material for: Synthesis and characterization of one-dimensional flat ZnO nanotower arrays as high-efficiency adsorbents for the photocatalytic remediation of water pollutants
Source: Royal Society of Chemistry journal article supplement (doi:10.1039/c0nr00537a), 2010-01-01
Supplement: c0nr00537a.pdf [file c0nr00537a.pdf]

# Synthesis and Characterization of One-Dimensional Flat ZnO Nanotower Arrays as High-Efficiency Adsorbents for the Photocatalytic Remediation of Water Pollutants

Da Deng, Scot T. Martin and Shriram Ramanathan\*  
Harvard School of Engineering and Applied Sciences  
Cambridge, MA 02138, USA  
\*E-mail: shriram@seas.harvard.edu

## Supporting information

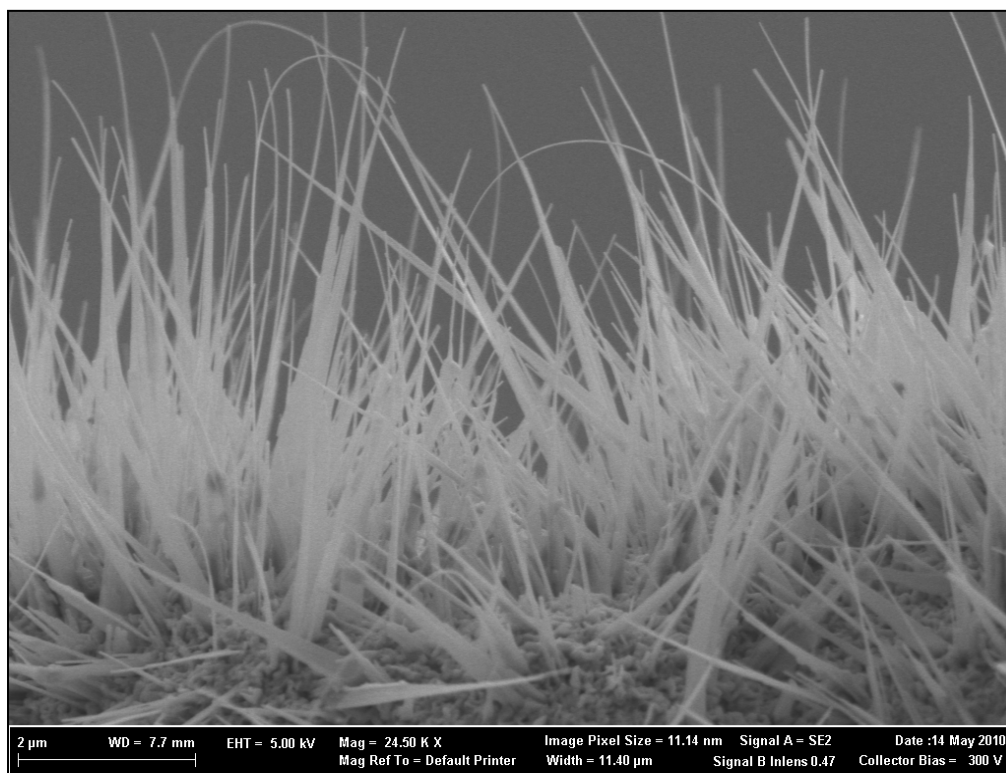

**SI 1.** The side view of ZnO nanotower arrays fabricated on Si wafer surface

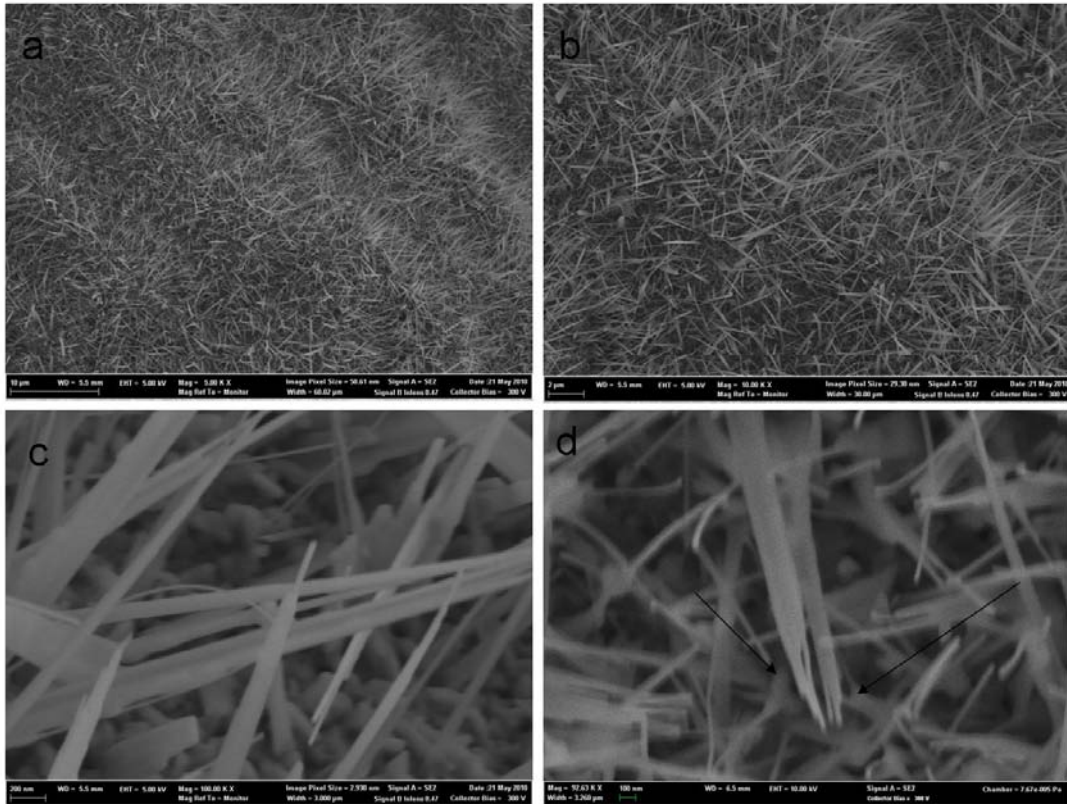

**SI2.** (a,b,c) FESEM images of ZnO nanotowers fabricated directly on Zn foil at 550°C after 2 hour oxidation in air at different magnification; (d) Two typical ZnO nanotowers on glass slide with arrows highlighting the branches at the tips.

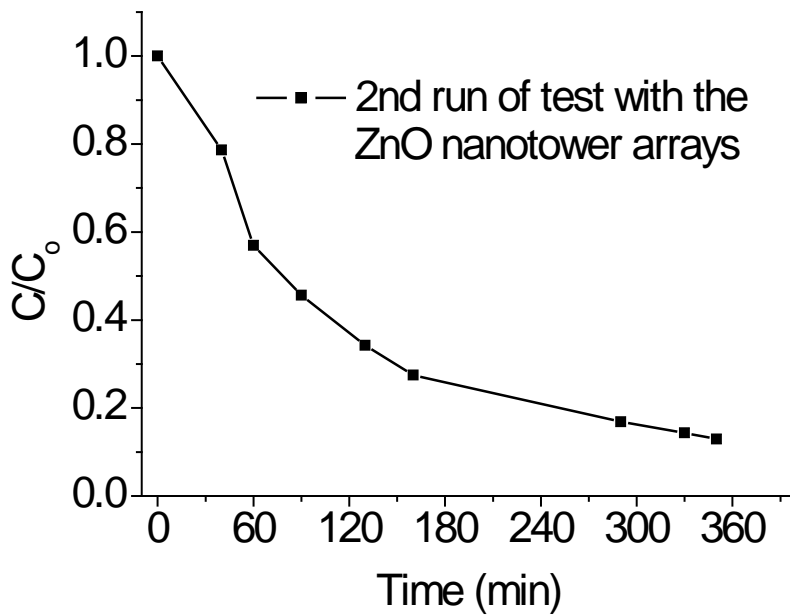

**SI 3.** The ZnO flat nanotower arrays was reused for adsorption test after the dye adsorbed in the 1<sup>st</sup> run was decomposed under UV light.
